# Supplementary figures and images for: Integration of phot1, phot2, and PhyB signalling in light-induced chloroplast movements
Source: PubMed Central journal article supplement — J Exp Bot. 2010 Aug 6;61(15):4387–97. doi: 10.1093/jxb/erq242 (PMC2955749; doi:10.1093/jxb/erq242), 2010-08-06

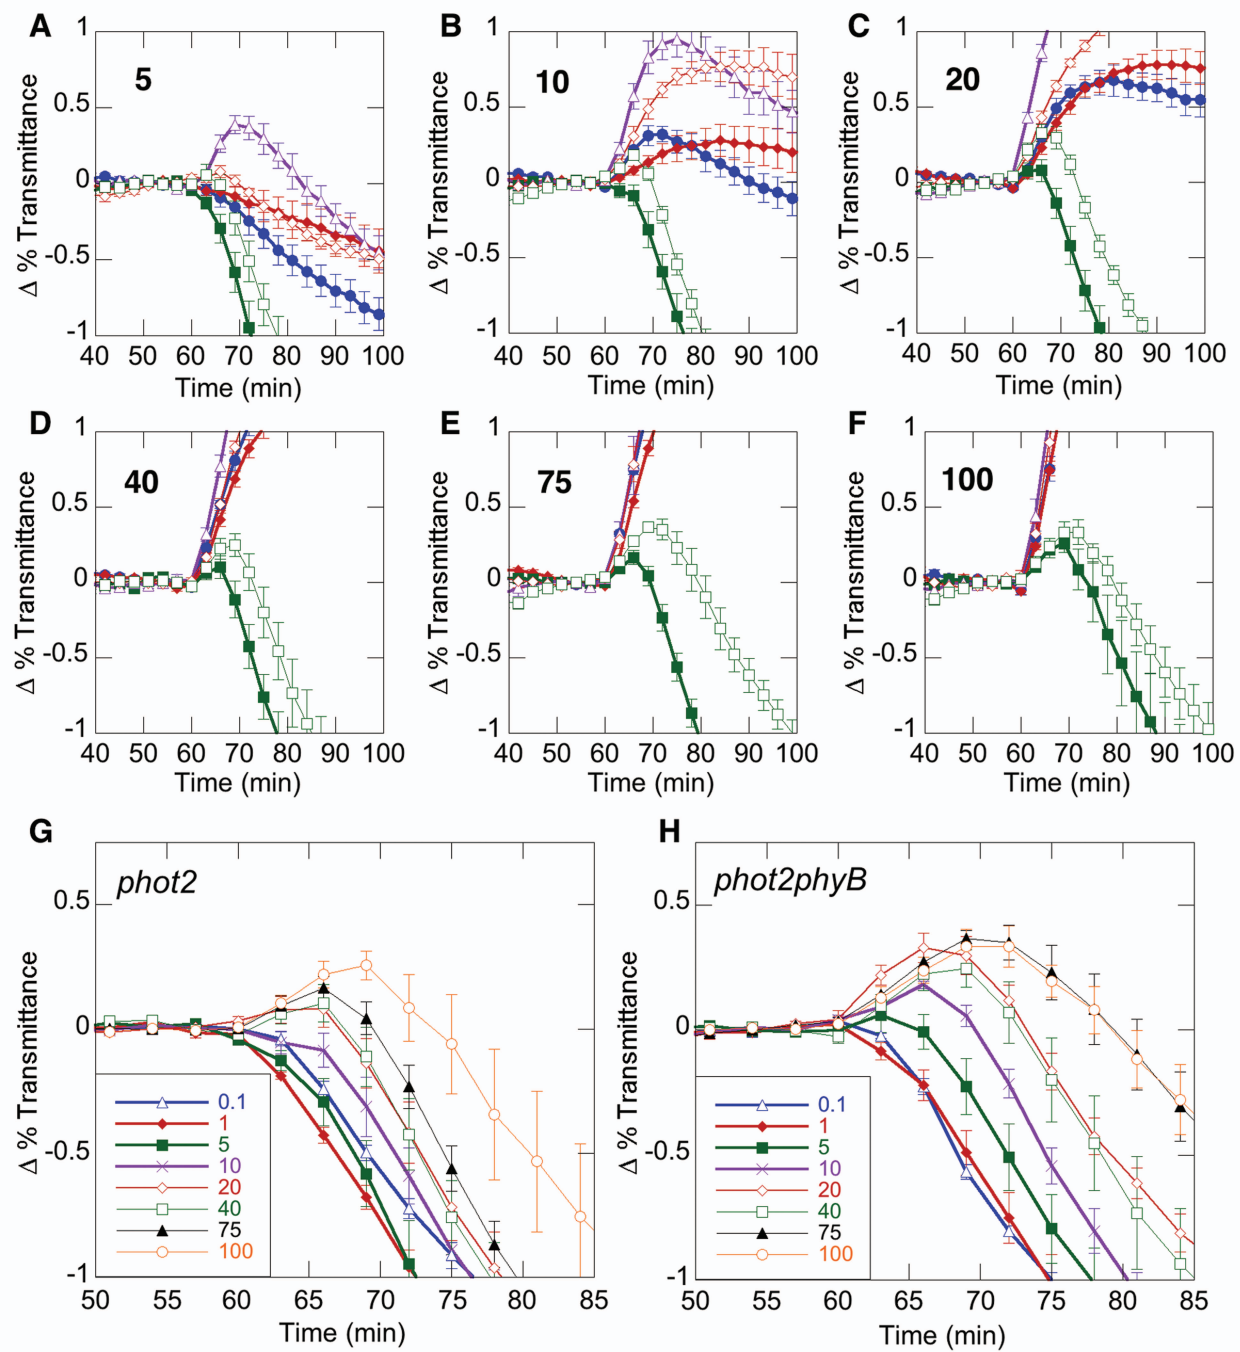

Supplement: supp_erq242_00050112-file002.pdf [file supp_erq242_00050112-file002.pdf]
